# Supplementary material for: High-performance bifunctional porous non-noble metal phosphide catalyst for overall water splitting
Source: PubMed Central journal article supplement (PMC6026163; doi:10.1038/s41467-018-04746-z), 2018-06-29
Supplement: 41467_2018_4746_MOESM1_ESM.pdf [file 41467_2018_4746_MOESM1_ESM.pdf]

**Supplementary Information for**

**High-performance bifunctional porous non-noble metal phosphide catalyst for overall water splitting**

*Yu et al.*

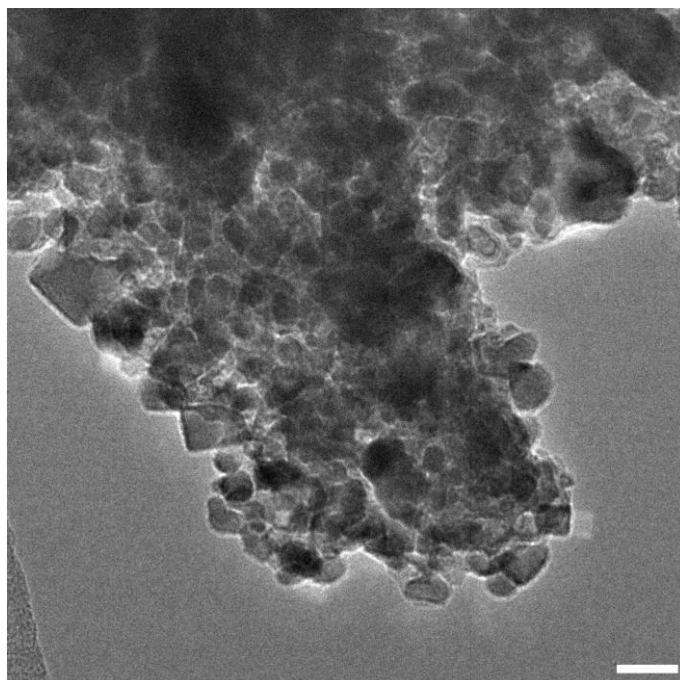

**Supplementary Figure 1.** A typical TEM image of as-prepared FeP/Ni<sub>2</sub>P nanoparticles. Scale bar: 25 nm.

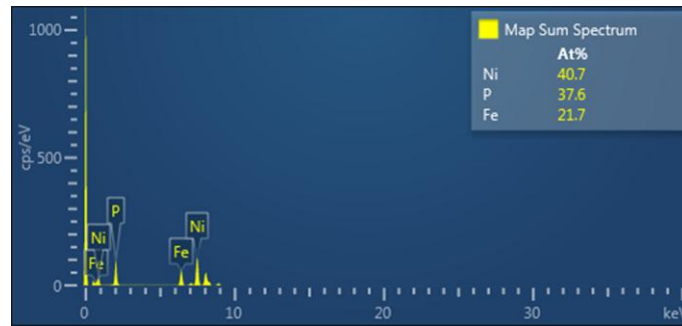

**Supplementary Figure 2.** Energy dispersive X-ray (EDX) spectrum of FeP/Ni<sub>2</sub>P nanoparticles.

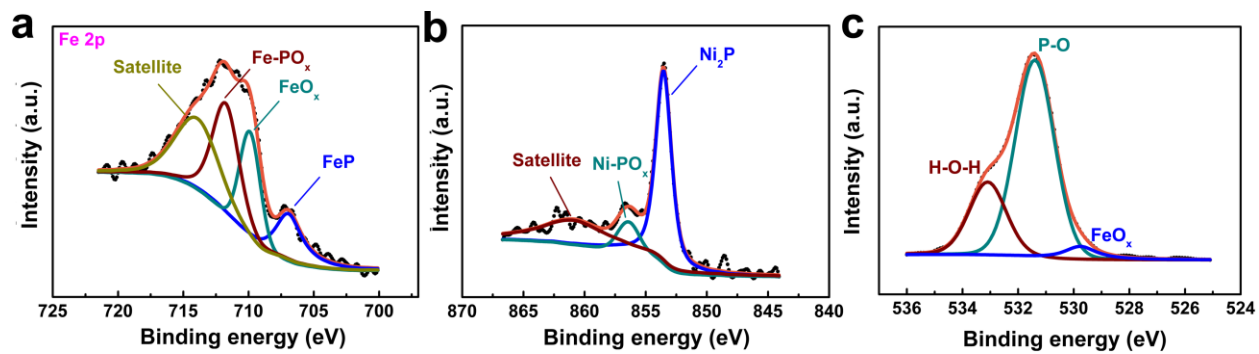

**Supplementary Figure 3.** XPS analysis of the original FeP/Ni<sub>2</sub>P hybrid catalyst. **a** Fe 2p<sup>3/2</sup>. **b** Ni 2p<sup>3/2</sup>. **c** O 1s.

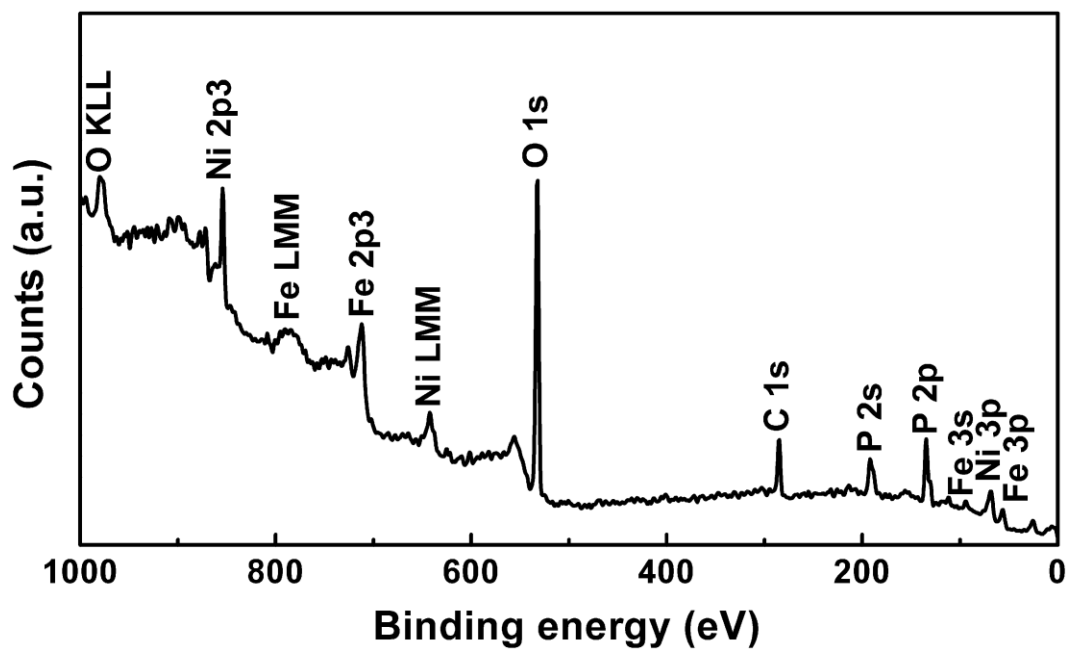

**Supplementary Figure 4.** XPS survey spectrum of the original FeP/Ni<sub>2</sub>P hybrid catalyst.

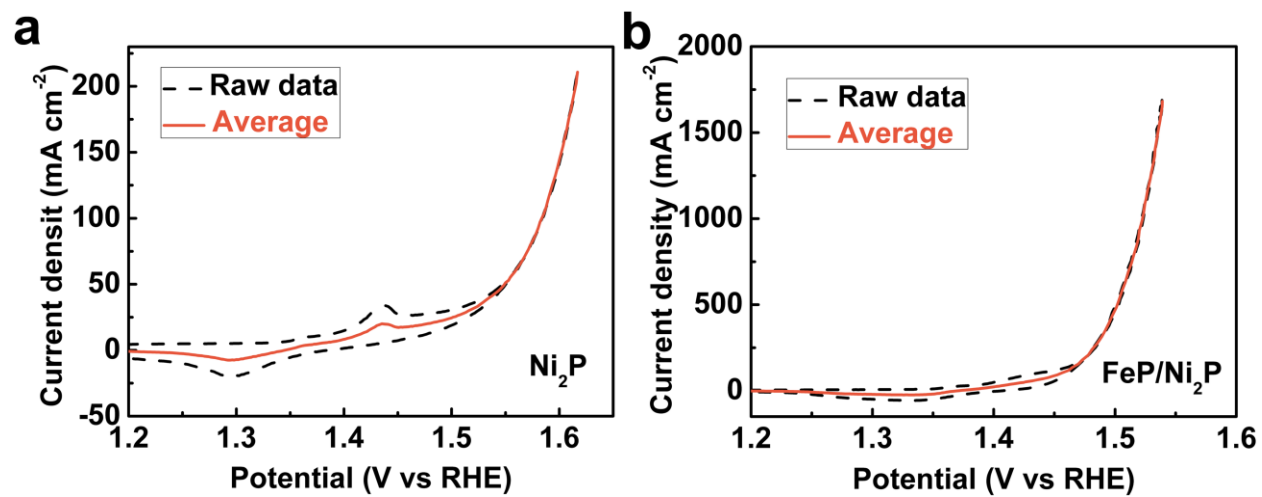

**Supplementary Figure 5.** A cyclic voltammetry (CV) curve (black) and corresponding average activity calculated from the CV curve (orange). **a**  $\text{Ni}_2\text{P}$  and **b**  $\text{FeP/Ni}_2\text{P}$ . Scan rate:  $1 \text{ mV s}^{-1}$ .

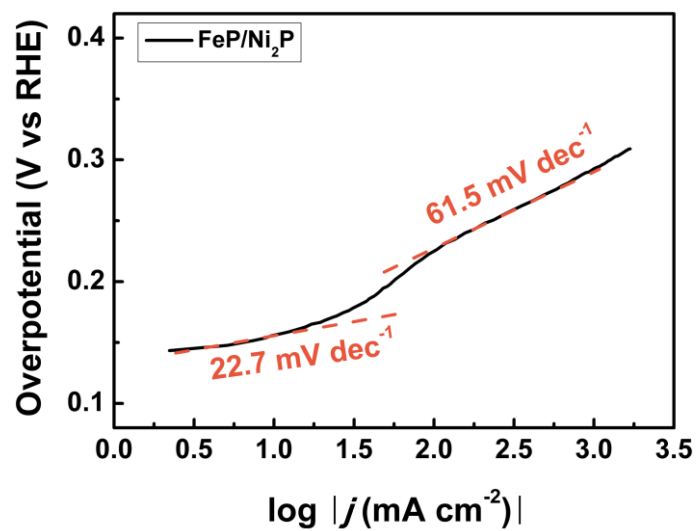

**Supplementary Figure 6.** Detailed Tafel slope analysis with a wide range of OER overpotentials.

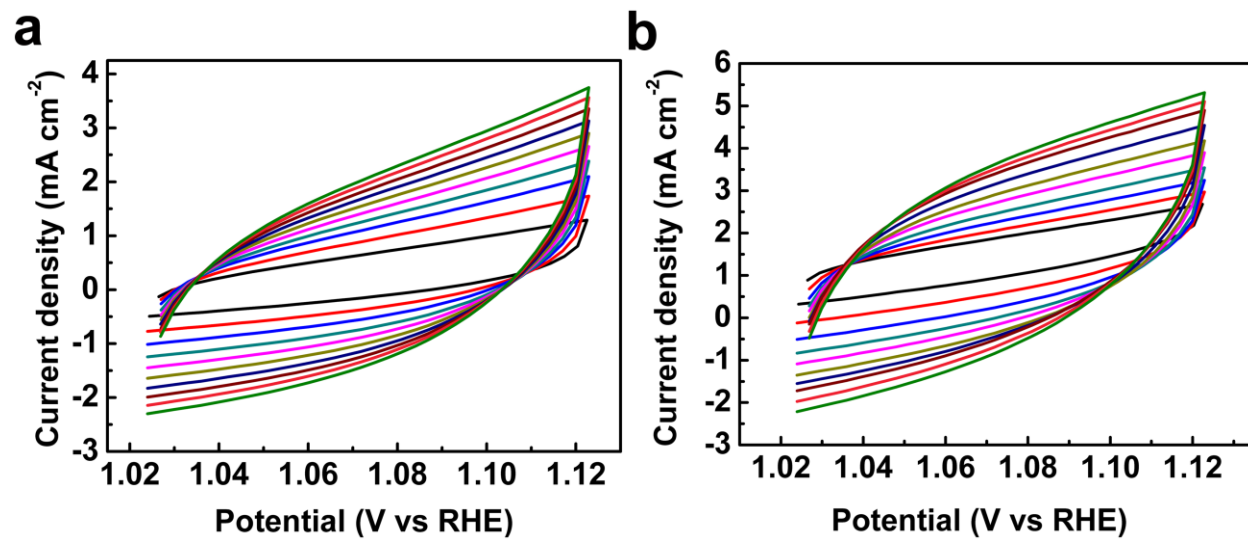

**Supplementary Figure 7.** Scan rate dependence of the current densities in the CV curves of different OER catalysts with scan rates ranging from  $10 \text{ mV s}^{-1}$  to  $100 \text{ mV s}^{-1}$  at intervals of  $10 \text{ mV s}^{-1}$ . **a**  $\text{Ni}_2\text{P}$  and **b**  $\text{FeP/Ni}_2\text{P}$ .



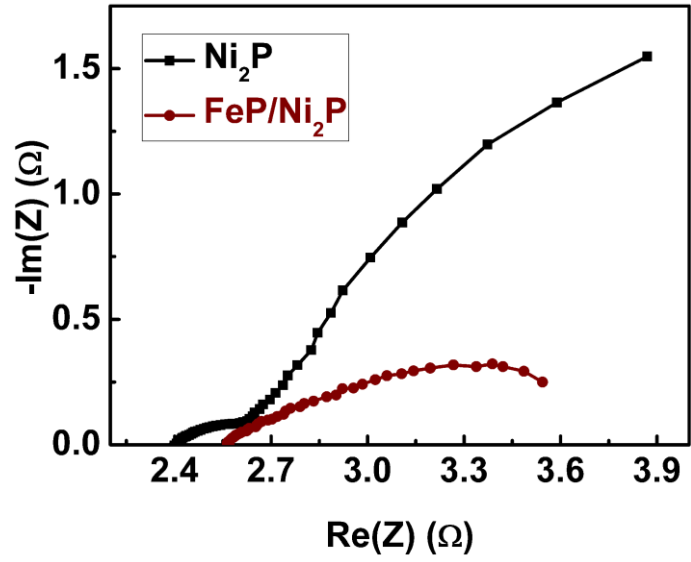

**Supplementary Figure 8.** Nyquist plots of electrochemical impedance spectroscopy (EIS) for OER catalyzed by Ni<sub>2</sub>P and FeP/Ni<sub>2</sub>P at an overpotential of 300 mV.

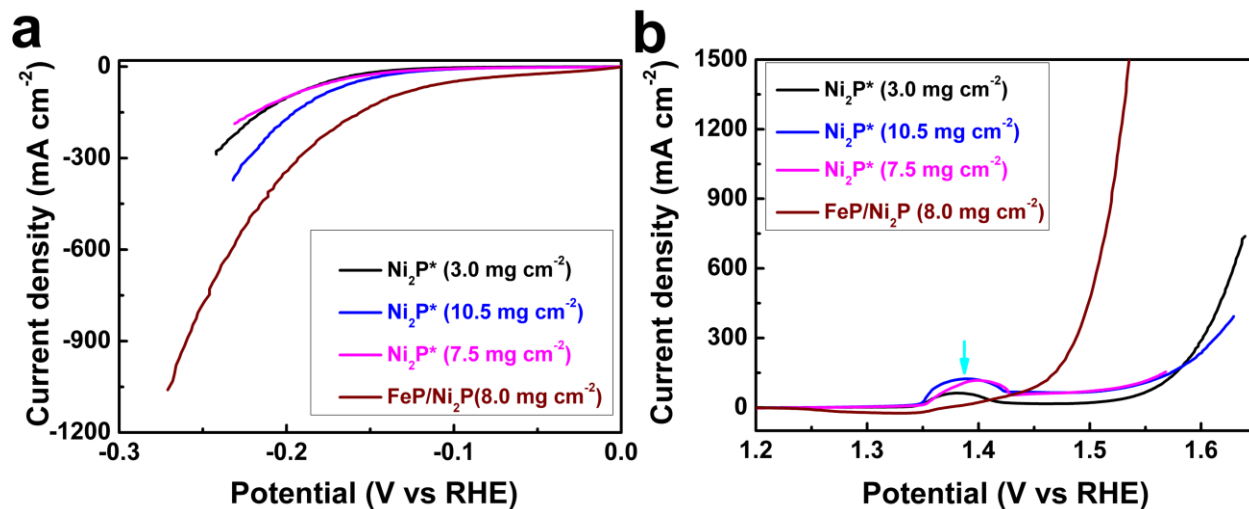

**Supplementary Figure 9.** The catalytic activities of  $\text{Ni}_2\text{P}^*$  catalysts grown on Ni foam with different loadings by using different  $\text{Ni}(\text{NO}_3)_2$  precursor solutions. **a** HER polarization curves; **b** OER polarization curves.

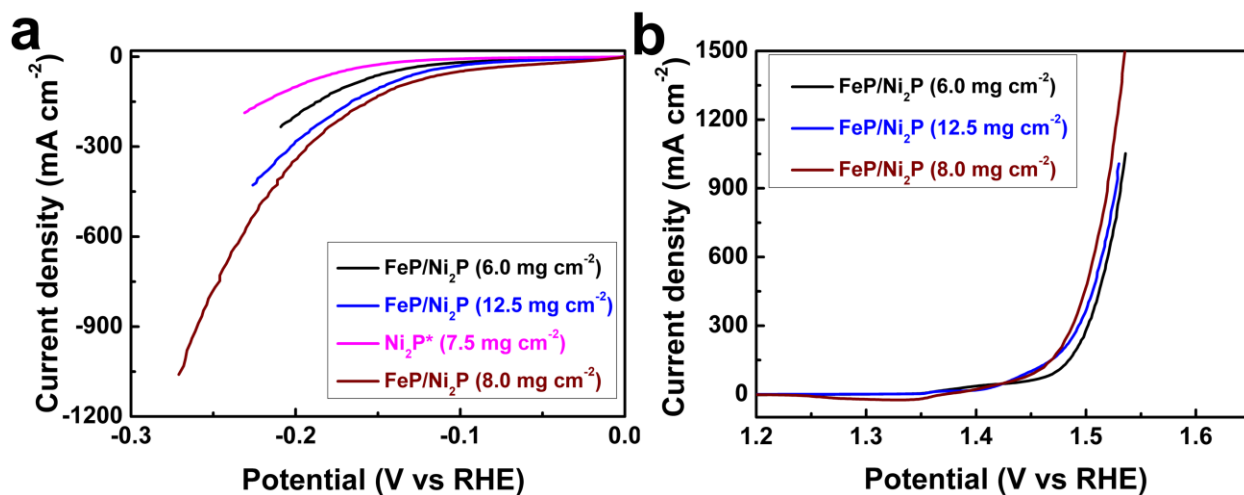

**Supplementary Figure 10.** The modulation on the catalytic performances of FeP/Ni<sub>2</sub>P hybrids by tuning the loadings of FeP particles. It is found that  $8 \text{ mg cm}^{-2}$  is an optimal catalyst loading for FeP/Ni<sub>2</sub>P hybrid grown on top of Ni foam. **a** HER polarization curves; **b** OER polarization curves.

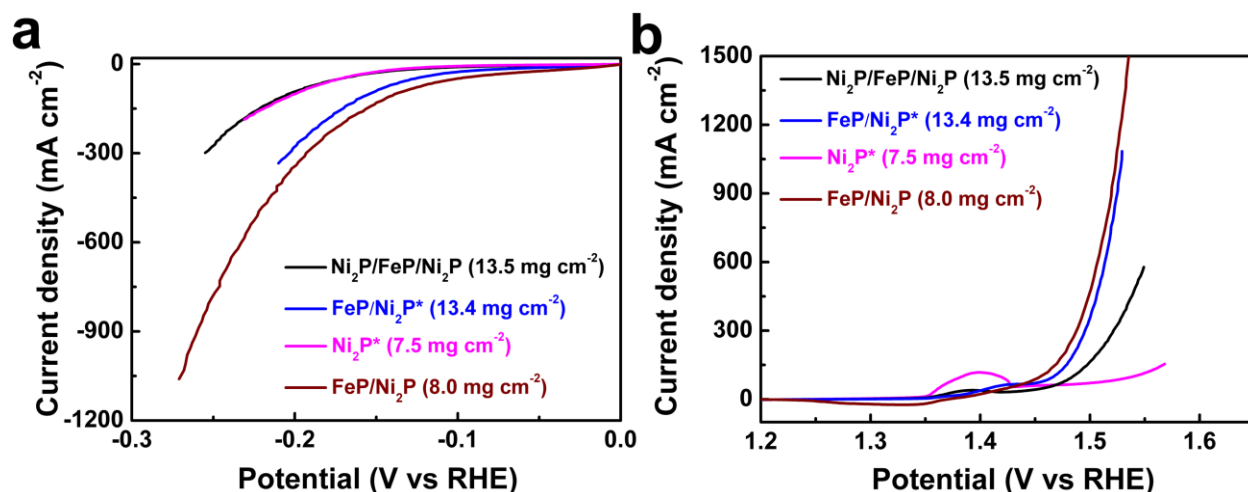

**Supplementary Figure 11.** The polarization curves of different catalysts showing the effects of  $\text{Ni}_2\text{P}$  and FeP order on the catalytic activities. **a** HER and **b** OER catalytic activities. Obviously, if  $\text{Ni}_2\text{P}$  was grown on top of  $\text{FeP/Ni}_2\text{P}$  ( $8.0 \text{ mg cm}^{-2}$ ), the as-obtained  $\text{Ni}_2\text{P/FeP/Ni}_2\text{P}$  hybrid ( $13.5 \text{ mg cm}^{-2}$ ) shows much poorer catalytic activities compared to that when FeP was grown on  $\text{Ni}_2\text{P}^*$  ( $7.5 \text{ mg cm}^{-2}$ ) surface forming  $\text{FeP/Ni}_2\text{P}^*$  ( $13.4 \text{ mg cm}^{-2}$ ). The hybrid  $\text{FeP/Ni}_2\text{P}$  ( $8.0 \text{ mg cm}^{-2}$ ) is the sample that we investigated in our main texts.

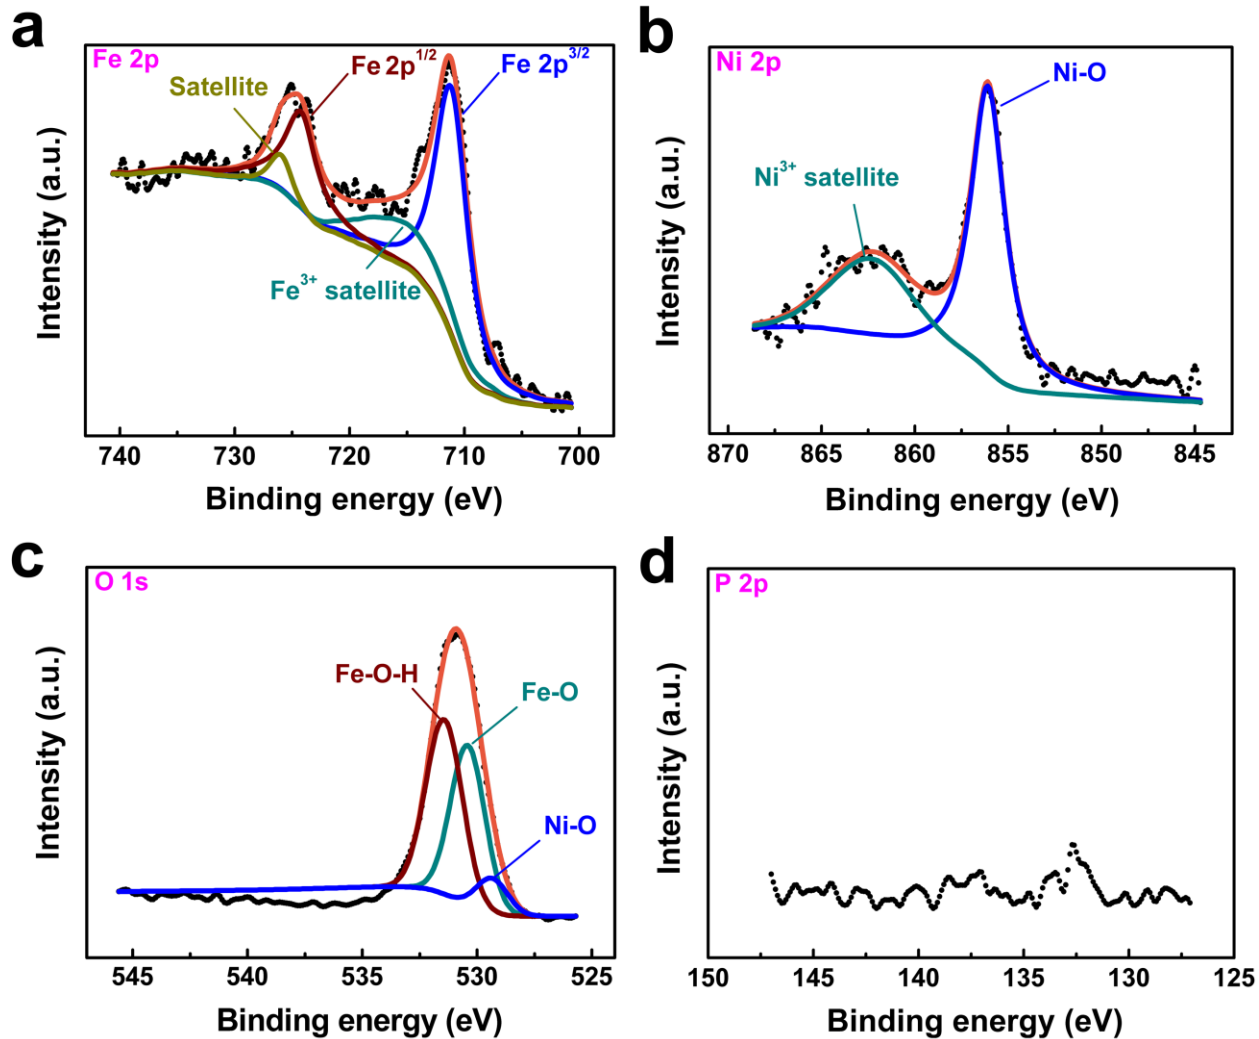

**Supplementary Figure 12.** XPS analysis of the post-OER samples. **a** Fe 2p region. **b** Ni 2p<sup>3/2</sup> region. **c** O 1s region. **d** P 2p region. From these XPS spectra, we can deduce that the real active sites for the OER are possibly the mixed NiFe oxides/oxyhydroxides on the surface.

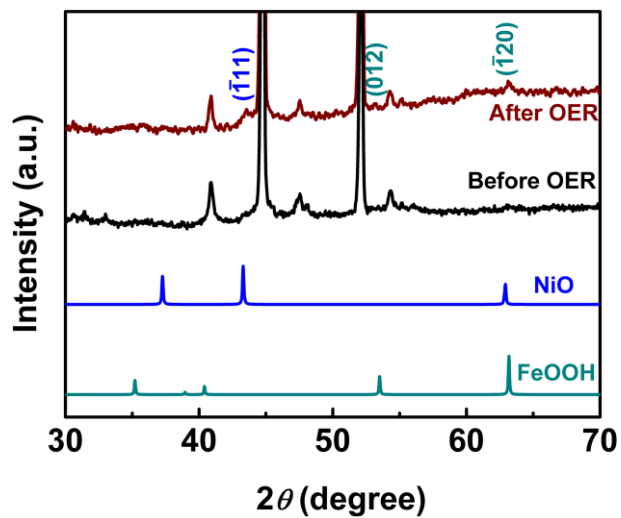

**Supplementary Figure 13.** XRD patterns of the FeP/Ni<sub>2</sub>P nanoparticles after OER testing.

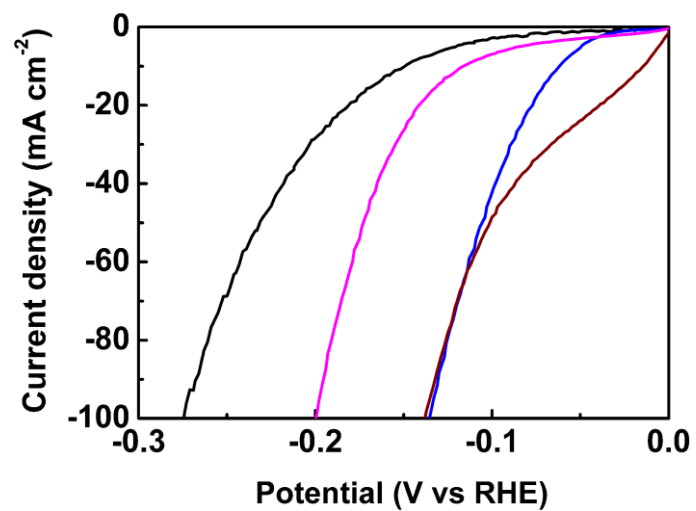

**Supplementary Figure 14.** Enlarged polarization curves of different HER electrocatalysts.

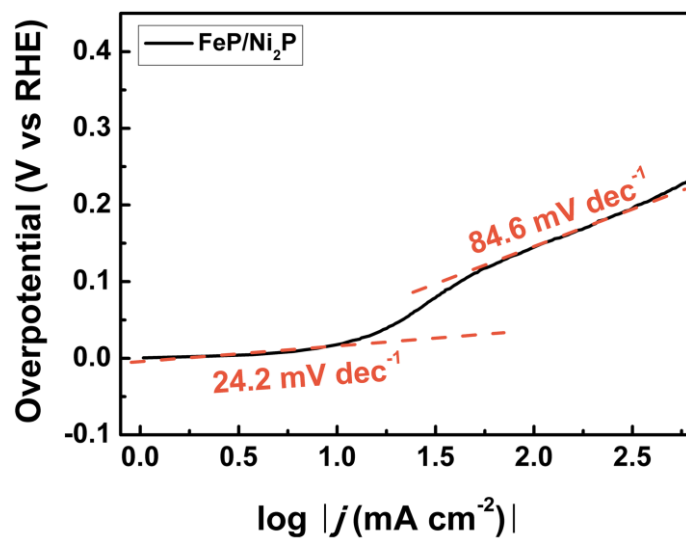

**Supplementary Figure 15.** Detailed Tafel slope analysis with a wide range of HER overpotentials.



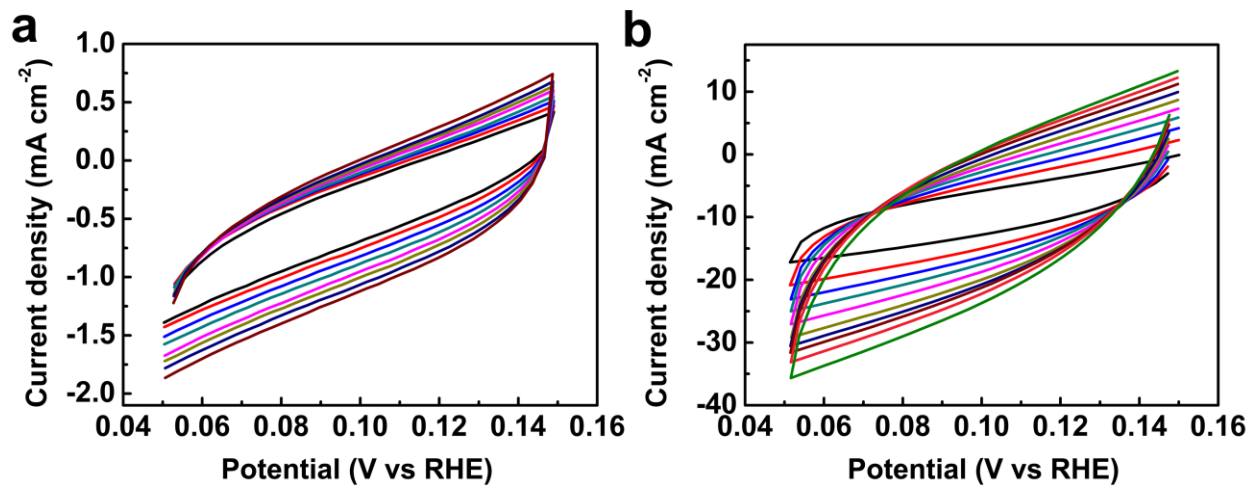

**Supplementary Figure 16.** Scan rate dependence of the current densities in the CV curves of different HER catalysts with scan rates ranging from  $1 \text{ mV s}^{-1}$  to  $10 \text{ mV s}^{-1}$  at intervals of  $1 \text{ mV s}^{-1}$ . **a**  $\text{Ni}_2\text{P}/\text{Ni}$  foam and **b**  $\text{FeP}/\text{Ni}_2\text{P}$ .

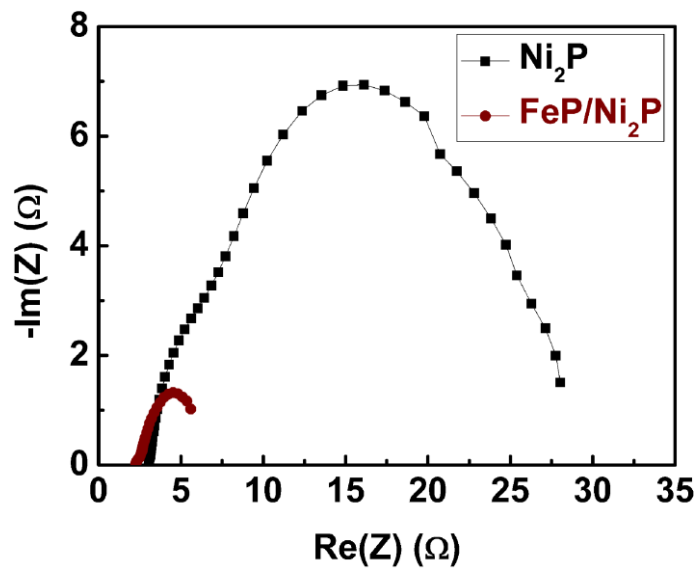

**Supplementary Figure 17.** Nyquist plots of Ni<sub>2</sub>P and FeP/Ni<sub>2</sub>P for HER measured at -150 mV vs RHE.

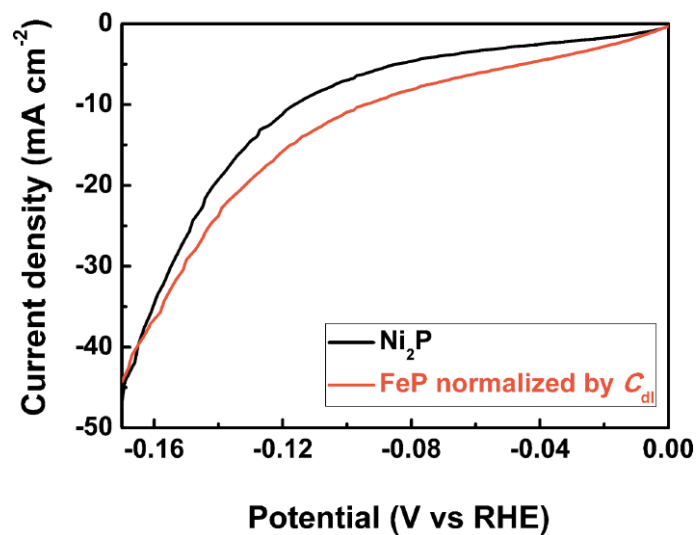

**Supplementary Figure 18.** Comparison of the catalytic HER activity with the same active surface area normalized by the double-layer capacitance ( $C_{dl}$ ) difference between FeP/Ni<sub>2</sub>P hybrid and just Ni<sub>2</sub>P catalyst.

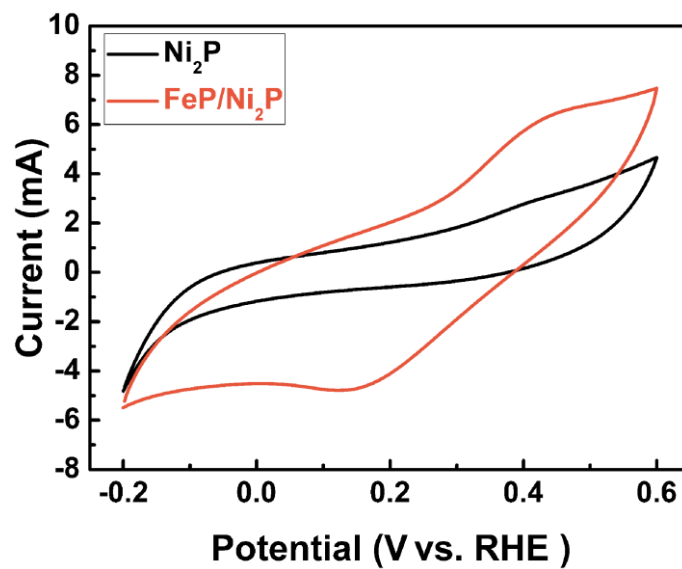

**Supplementary Figure 19.** CV curves recorded on the FeP/Ni<sub>2</sub>P hybrid and pure Ni<sub>2</sub>P electrodes in the potential ranges between -0.2 V vs RHE and 0.6 V vs RHE. The scan rate was 50 mV s<sup>-1</sup>. Electrolyte: 1 M phosphate buffered saline (PBS).

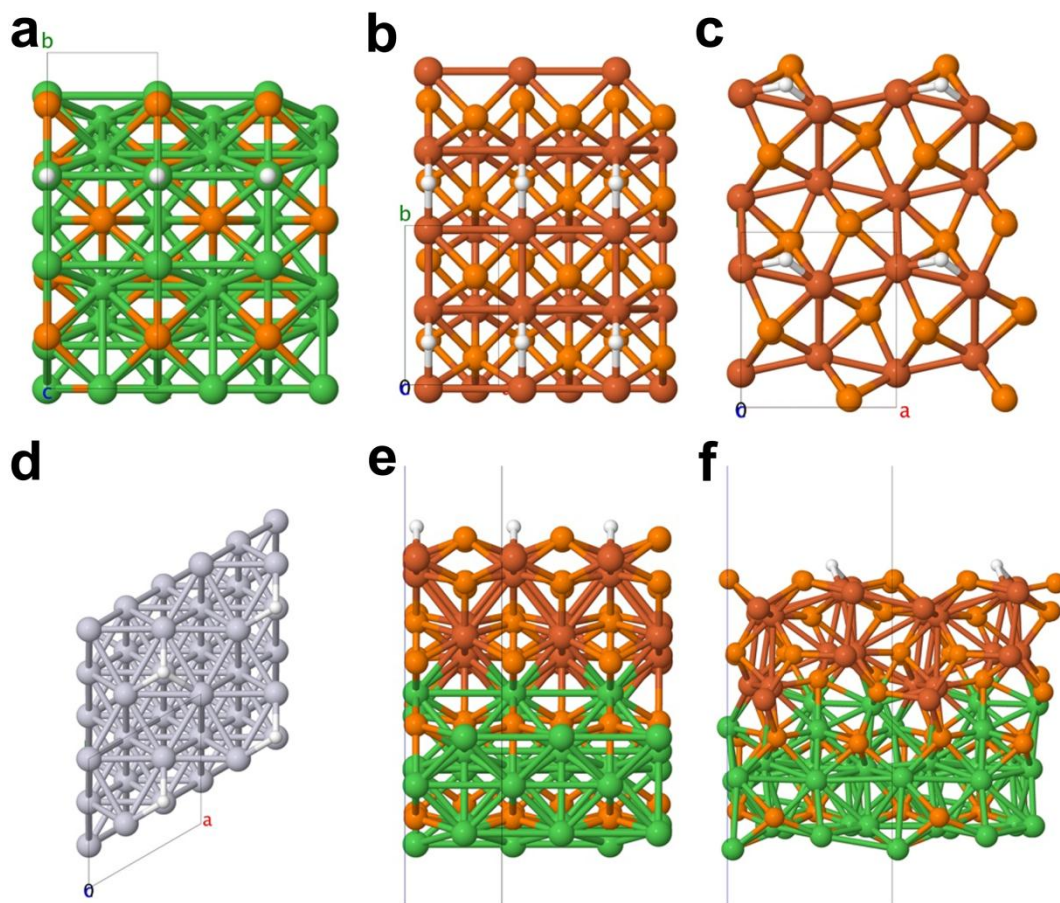

**Supplementary Figure 20.** Molecular structures of the systems calculated. **a**  $\text{Ni}_2\text{P}(100)$ ; **b**  $\text{FeP}(001)$ ; **c**  $\text{FeP}(010)$ ; **d**  $\text{Pt}(111)$ ; **e**  $\text{FeP}(001)$  on  $\text{Ni}_2\text{P}(100)$ , side view; **f**  $\text{FeP}(010)$  on  $\text{Ni}_2\text{P}(100)$ , side view.

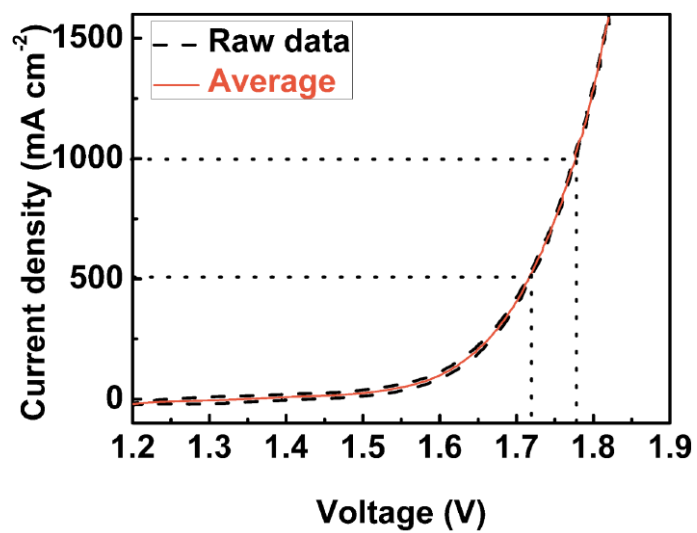

**Supplementary Figure 21.** A cyclic voltammetry (CV) curve (black) and corresponding average activity calculated from the CV curve (red) of FeP/Ni<sub>2</sub>P as a bifunctional catalyst for overall water splitting. Scan rate: 1 mV s<sup>-1</sup>.

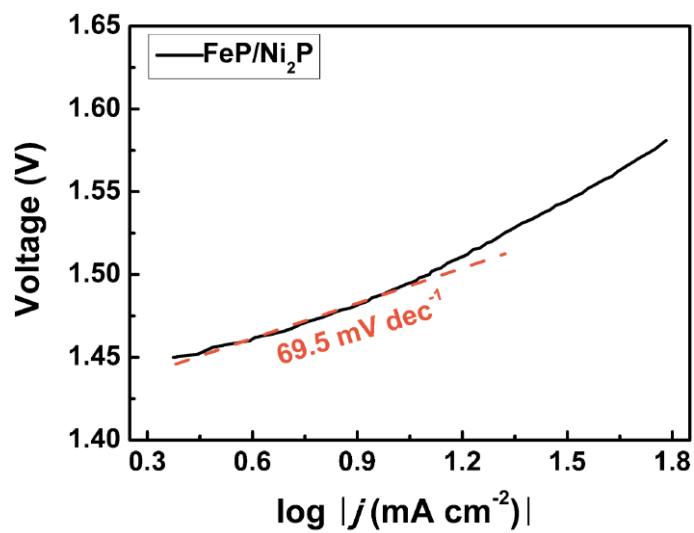

**Supplementary Figure 22.** Tafel analysis of the relevant polarization curve for overall water splitting.

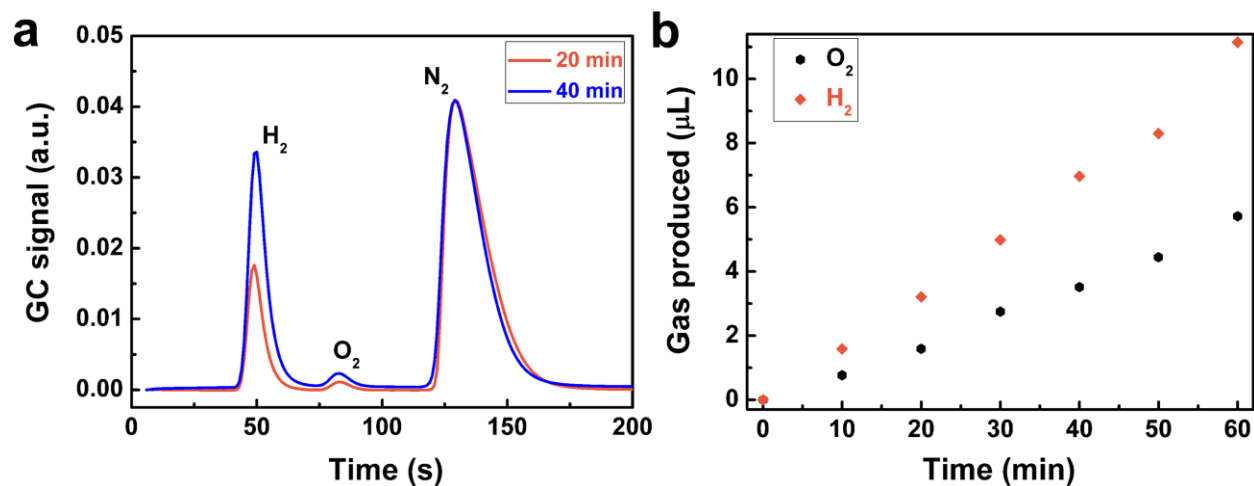

**Supplementary Figure 23.** Measurements of gas products from overall water splitting by gas chromatography (GC). **a** GC signals for the FeP/Ni<sub>2</sub>P-based water alkaline electrolyzer after 20 and 40 min of overall water splitting. **b** The amounts of H<sub>2</sub> and O<sub>2</sub> gases versus time at a constant current density of 100 mA cm<sup>-2</sup>. It is shown that there is a stoichiometric ratio around 2:1 between generated H<sub>2</sub> and O<sub>2</sub>.



**Supplementary Table 1.** The distribution of surface oxidized species and metal phosphides quantified by the XPS survey spectrum, Fe 2p<sup>3/2</sup> and Ni 3p<sup>3/2</sup> XPS spectra of the original FeP/Ni<sub>2</sub>P hybrid catalyst.

| Elements | Fe   |                             | Ni   |                    | P     | O     | C     |
|----------|------|-----------------------------|------|--------------------|-------|-------|-------|
|          | Fe-P | Fe-PO <sub>x</sub> or oxide | Ni-P | Ni-PO <sub>x</sub> |       |       |       |
| Ratio    | 1.88 | 5.60                        | 3.57 | 0.56               | 18.47 | 48.41 | 21.51 |

**Supplementary Table 2.** Comparison of catalytic performance with the most recently reported OER catalysts.  $\eta_{10,\text{OER}}$  corresponds to the overpotential of OER catalyzed at a current density of  $10 \text{ mA cm}^{-2}$ , while  $j_{300,\text{OER}}$  corresponds to the current density at 300 mV overpotential for the OER.

| OER catalysts                                         | Electrolytes | $\eta_{10,\text{OER}}$ (mV) | Tafel ( $\text{mV dec}^{-1}$ )               | Source    |
|-------------------------------------------------------|--------------|-----------------------------|----------------------------------------------|-----------|
| FeP/Ni <sub>2</sub> P                                 | 1.0 M KOH    | 154                         | 22.7                                         | Our work  |
| Gelled FeCoW                                          | 1.0 M KOH    | 191                         | 37                                           | 1         |
| Ni <sub>x</sub> Fe <sub>1-x</sub> Se <sub>2</sub> -DO | 1.0 M KOH    | 195                         | 28                                           | 2         |
| NiCeO <sub>x</sub> -Au                                | 1.0 M NaOH   | 270                         | -                                            | 3         |
| Ni <sub>2</sub> P nanoparticles                       | 1.0 M KOH    | 290                         | 59                                           | 4         |
| Co <sub>4</sub> N                                     | 1.0 M KOH    | 257                         | 44                                           | 5         |
| h-NiS <sub>x</sub>                                    | 1.0 M KOH    | 180                         | 96                                           | 6         |
| FeP-rGO                                               | 1.0 M KOH    | 260                         | 49.6                                         | 7         |
| Bifunctional catalysts for the OER                    | Electrolytes | $\eta_{10,\text{OER}}$ (mV) | $j_{300,\text{OER}}$ ( $\text{mA cm}^{-2}$ ) | Source    |
| FeP/Ni <sub>2</sub> P                                 | 1.0 M KOH    | 154                         | 1277                                         | This work |
| Porous MoO <sub>2</sub>                               | 1.0 M KOH    | 260                         | 41*                                          | 8         |
| Ni <sub>0.51</sub> Fe <sub>0.49</sub> P film          | 1.0 M KOH    | 239                         | 80*                                          | 9         |
| MoS <sub>2</sub> /Ni <sub>3</sub> S <sub>2</sub>      | 1.0 M KOH    | 218                         | 100*                                         | 10        |
| CoP <sub>2</sub> /rGO                                 | 1.0 M KOH    | 300                         | 10                                           | 11        |
| NiCo <sub>2</sub> S <sub>4</sub> nanowire array       | 1.0 M KOH    | 260                         | 19*                                          | 12        |
| Electrodeposited CoP film                             | 1.0 M KOH    | 345                         | 0.5*                                         | 13        |
| NiCo <sub>2</sub> O <sub>4</sub>                      | 1.0 M KOH    | 290                         | 24*                                          | 14        |
| EG/Co <sub>0.85</sub> Se/NiFe-LDH                     | 1.0 M KOH    | 206                         | 300*                                         | 15        |
| NiFe LDH                                              | 1.0 M KOH    | 240                         | 30*                                          | 16        |
| NiFe LDH@DG10                                         | 1.0 M KOH    | 201                         | 77.5*                                        | 17        |
| NiFe LDH/Cu NW                                        | 1.0 M KOH    | 199                         | 214*                                         | 18        |
| NiFeO <sub>x</sub> /CFP                               | 1.0 M KOH    | 230                         | 400*                                         | 19        |
| NiP/Ni                                                | 1.0 M KOH    | 247                         | 50*                                          | 20        |

**Supplementary Table 3.** Comparison of catalytic performance with the available non-noble HER catalysts in alkaline electrolytes.  $\eta_{10, \text{HER}}$  corresponds to the overpotential of HER catalyzed at  $10 \text{ mA cm}^{-2}$ , and  $j_{200, \text{HER}}$  is related to the current density at 200 mV overpotential.

| HER catalysts                                               | Electrolytes | $\eta_{10, \text{HER}}$ (mV) | Tafel (mV dec <sup>-1</sup> )                | Source    |
|-------------------------------------------------------------|--------------|------------------------------|----------------------------------------------|-----------|
| FeP/Ni <sub>2</sub> P                                       | 1.0 M KOH    | 14                           | 24.2                                         | This work |
| NiCo <sub>2</sub> P <sub>x</sub> Nanowires                  | 1.0 M KOH    | 58                           | 34.3                                         | 21        |
| Ni <sub>1-x</sub> Co <sub>x</sub> Se <sub>2</sub> nanosheet | 1.0 M KOH    | 85                           | 52.0                                         | 22        |
| CoP nanowire/CC                                             | 1.0 M KOH    | 209                          | 129.0                                        | 23        |
| Co/CoP nanocrystals                                         | 1.0 M KOH    | 135                          | 64.0                                         | 24        |
| FeP nanowire arrays                                         | 1.0 M KOH    | 194                          | 75                                           | 25        |
| MoNi <sub>4</sub> /MoO <sub>2</sub> cuboids                 | 1.0 M KOH    | 15                           | 30.0                                         | 26        |
| MoP crystals                                                | 1.0 M KOH    | ~ 140                        | 48.0                                         | 27        |
| Ni <sub>5</sub> P <sub>4</sub> (pellet)                     | 1.0 M KOH    | 49                           | 98.0                                         | 28        |
| Nanoporous Co <sub>2</sub> P                                | 1.0 M KOH    | 60                           | 40.0                                         | 29        |
| Bifunctional catalysts for the HER                          | Electrolytes | $\eta_{10, \text{HER}}$ (mV) | $j_{200, \text{HER}}$ (mA cm <sup>-2</sup> ) | Source    |
| FeP/Ni <sub>2</sub> P                                       | 1.0 M KOH    | 14                           | 346*                                         | This work |
| Porous MoO <sub>2</sub>                                     | 1.0 M KOH    | 27                           | 132*                                         | 8         |
| Ni <sub>0.51</sub> Fe <sub>0.49</sub> P film                | 1.0 M KOH    | 82                           | 236*                                         | 9         |
| MoS <sub>2</sub> /Ni <sub>3</sub> S <sub>2</sub>            | 1.0 M KOH    | 110                          | 92*                                          | 10        |
| CoP <sub>2</sub> /rGO                                       | 1.0 M KOH    | 88                           | 84*                                          | 11        |
| NiCo <sub>2</sub> S <sub>4</sub> nanowire array             | 1.0 M KOH    | 210                          | 7.4*                                         | 12        |
| Electrodeposited CoP film                                   | 1.0 M KOH    | 94                           | 480*                                         | 13        |
| NiCo <sub>2</sub> O <sub>4</sub>                            | 1.0 M KOH    | 110                          | 52*                                          | 14        |
| EG/Co <sub>0.85</sub> Se/NiFe-LDH                           | 1.0 M KOH    | 260                          | 4.3*                                         | 15        |
| NiFe LDH                                                    | 1.0 M KOH    | 210                          | 8.2*                                         | 16        |
| NiFe LDH@DG10                                               | 1.0 M KOH    | 66                           | 60*                                          | 17        |
| NiFe LDH/Cu NW                                              | 1.0 M KOH    | 116                          | 124*                                         | 18        |
| NiFeO <sub>x</sub> /CFP                                     | 1.0 M KOH    | 88                           | 62*                                          | 19        |
| NiP/Ni                                                      | 1.0 M KOH    | 130                          | 134*                                         | 20        |

**Supplementary Table 4.** Calculated  $\Delta G_H$  in eV.

| $\Delta G_H$ (eV)          | Acidic condition (pH=0) | Basic condition (pH=14) |
|----------------------------|-------------------------|-------------------------|
| Ni <sub>2</sub> P(100)     | 0.399                   | 0.306                   |
| FeP(001)                   | -0.059                  | -0.057                  |
| FeP(010)                   | -0.221                  | -0.237                  |
| FeP(001)/Ni <sub>2</sub> P | -0.279                  | -0.255                  |
| FeP(010)/Ni <sub>2</sub> P | -0.238                  | -0.230                  |
| Pt                         | -0.184                  | -0.135                  |

**Supplementary Table 5.** Comparison of the HER, OER and overall water splitting activities with available robust bifunctional catalysts.  $\eta_{10,HER}$ ,  $\eta_{10,OER}$ ,  $\eta_{10,overall}$ ,  $\eta_{100,overall}$  and  $j_{1.7,overall}$  correspond to the overpotentials of HER, OER catalyzed at  $10 \text{ mA cm}^{-2}$ , the cell voltages at 10 and  $100 \text{ mA cm}^{-2}$ , and current density at 1.7 V for the overall water splitting, respectively.

| Catalyst                                         | Electrolytes | $\eta_{10,HER}$<br>(mV) | $\eta_{10,OER}$<br>(mV) | $\eta_{10,overall}$<br>(V) | $\eta_{100,overall}$<br>(V) | $j_{1.7,overall}$<br>( $\text{mA cm}^{-2}$ ) | Source    |
|--------------------------------------------------|--------------|-------------------------|-------------------------|----------------------------|-----------------------------|----------------------------------------------|-----------|
| FeP/Ni <sub>2</sub> P                            | 1.0 M KOH    | 14                      | 154                     | 1.42                       | 1.602                       | 406                                          | This work |
| Porous MoO <sub>2</sub>                          | 1.0 M KOH    | 27                      | 260                     | 1.53                       | 1.8*                        | 67*                                          | 8         |
| Ni <sub>0.51</sub> Fe <sub>0.49</sub> P film     | 1.0 M KOH    | 82                      | 239                     | 1.57                       | 1.71*                       | 87*                                          | 9         |
| MoS <sub>2</sub> /Ni <sub>3</sub> S <sub>2</sub> | 1.0 M KOH    | 110                     | 218                     | 1.56                       | 1.71*                       | 91.4*                                        | 10        |
| CoP <sub>2</sub> /rGO                            | 1.0 M KOH    | 88                      | 300                     | 1.56                       | 1.912*                      | 31*                                          | 11        |
| NiCo <sub>2</sub> S <sub>4</sub> nanowire array  | 1.0 M KOH    | 210                     | 260                     | 1.63                       | 2.097*                      | 16*                                          | 12        |
| Electrodeposited Co-P film                       | 1.0 M KOH    | 94                      | 345                     | 1.64*                      | 1.745*                      | 42*                                          | 13        |
| NiCo <sub>2</sub> O <sub>4</sub>                 | 1.0 M NaOH   | 110                     | 290                     | 1.65                       | 1.842*                      | 16*                                          | 14        |
| EG/Co <sub>0.85</sub> Se/NiFe-LDH                | 1.0 M KOH    | 260                     | 206                     | 1.67                       | 1.907*                      | 16.6*                                        | 15        |
| NiFe LDH                                         | 1.0 M NaOH   | 210                     | 240                     | 1.7                        | 2.241*                      | 10                                           | 16        |
| NiFe LDH@DG10                                    | 1.0 M KOH    | 66                      | 201                     | 1.44*                      | 1.87*                       | 60*                                          | 17        |
| NiFe LDH/Cu NW                                   | 1.0 M KOH    | 116                     | 199                     | 1.54                       | 1.69*                       | 111*                                         | 18        |
| NiFeO <sub>x</sub> /CFP                          | 1.0 M KOH    | 88                      | 230                     | 1.51                       | 1.73*                       | 70*                                          | 19        |
| NiP/Ni                                           | 1.0 M KOH    | 130                     | 247                     | 1.61                       | 2.102*                      | 24*                                          | 20        |

\*The data were calculated according to the curves given in the literature.

### Supplementary Note 1: Calculation of turn over frequency (TOF).

Supposing that every active site was accessible to the electrolyte, the TOF values can be calculated by the following formula:

$$TOF = \frac{1}{2} \frac{I}{nF} \quad (1)$$

where these physical variables  $F$ ,  $n$ , and  $I$  are corresponding to the Faraday constant ( $\sim 96485$  C/mol), the number of active sites (mol), and the current (A) during the LSV measurement in 1 M KOH, respectively. The factor  $1/2$  is due to fact that two electrons are required to form one hydrogen molecule from two protons.

The number of active sites was determined by an electrochemical method.<sup>30,31</sup> The CV curves were measured in 1M PBS electrolyte (pH = 7). Due to the difficulty in assigning the observed peaks to a given redox couple, the number of active sites is nearly proportional to the integrated voltammetric charges (cathodic and anodic) over the CV curves. Supposing a one-electron process for both reduction and oxidation, we can get the upper limit of the number of active sites ( $n$ ) based on the follow equation:

$$n = \frac{Q}{2F} \quad (2)$$

where  $F$  and  $Q$  are the Faraday constant and the whole charge of CV curve, respectively. By this equation and the CV curves, we can obtain the number of active sites for the FeP/Ni<sub>2</sub>P hybrid is around  $3.71 \times 10^{-7}$  mol, while this value is changed to  $1.47 \times 10^{-7}$  mol for the pure Ni<sub>2</sub>P catalyst, meaning that the FeP/Ni<sub>2</sub>P hybrid has active sites 2.5 times that of just Ni<sub>2</sub>P catalyst.

## Supplementary references

1. Zhang, B. *et al.* Homogeneously dispersed multimetal oxygen-evolving catalysts. *Science* **352**, 333-337 (2016).
2. Xu, X., Song, F. & Hu, X. L. A nickel iron diselenide-derived efficient oxygen-evolution catalyst. *Nat. Commun.* **7**, 12324 (2016).
3. Ng, J. W. D. *et al.* Gold-supported cerium-doped NiO<sub>x</sub> catalysts for water oxidation. *Nature Energy* **1**, 16053 (2016).
4. Stern, L. A., Feng, L. G., Song, F. & Hu, X. L. Ni<sub>2</sub>P as a Janus catalyst for water splitting: the oxygen evolution activity of Ni<sub>2</sub>P nanoparticles. *Energy Environ. Sci.* **8**, 2347-2351 (2015).
5. Chen, P. Z. *et al.* Metallic Co<sub>4</sub>N porous nanowire arrays activated by surface oxidation as electrocatalysts for the oxygen evolution reaction. *Angew. Chem. Int. Ed.* **54**, 14710-14714 (2015).
6. You, B. & Sun, Y. J. Hierarchically porous nickel sulfide multifunctional superstructures. *Adv. Energy Mater.* **6**, 1502333 (2016).
7. Masud, J., Umapathi, S., Ashokaan, N. & Nath, M. Iron phosphide nanoparticles as an efficient electrocatalyst for the OER in alkaline solution. *J. Mater. Chem. A* **4**, 9750-9754 (2016).
8. Jin, Y. S. *et al.* Porous MoO<sub>2</sub> nanosheets as non-noble bifunctional electrocatalysts for overall Water Splitting. *Adv. Mater.* **28**, 3785-3790 (2016).
9. Yu, J. *et al.* Ternary metal phosphide with triple-layered structure as a low-cost and efficient electrocatalyst for bifunctional water splitting. *Adv. Funct. Mater.* **26**, 7644-7651 (2016).
10. Zhang, J. *et al.* Interface engineering of MoS<sub>2</sub>/Ni<sub>3</sub>S<sub>2</sub> heterostructures for highly enhanced electrochemical overall-water-splitting activity. *Angew. Chem. Int. Ed.* **55**, 6702-6707 (2016).

11. Wang, J. M., Yang, W. R. & Liu, J. Q. CoP<sub>2</sub> nanoparticles on reduced graphene oxide sheets as a super-efficient bifunctional electrocatalyst for full water splitting. *J. Mater. Chem. A* **4**, 4686-4690 (2016).
12. Sivanantham, A., Ganesan, P. & Shanmugam, S. Hierarchical NiCo<sub>2</sub>S<sub>4</sub> nanowire arrays supported on Ni foam: an efficient and durable bifunctional electrocatalyst for oxygen and hydrogen evolution reactions. *Adv. Funct. Mater.* **26**, 4661-4672 (2016).
13. Jiang, N., You, B., Sheng, M. L. & Sun, Y. J. Electrodeposited cobalt-phosphorous-derived films as competent bifunctional catalysts for overall water splitting. *Angew. Chem. Int. Ed.* **54**, 6251-6254 (2015).
14. Gao, X. H. *et al.* Hierarchical NiCo<sub>2</sub>O<sub>4</sub> hollow microcuboids as bifunctional electrocatalysts for overall water splitting. *Angew. Chem. Int. Ed.* **55**, 6290-6294 (2016).
15. Hou, Y. *et al.* Vertically oriented cobalt selenide/NiFe layered-double-hydroxide nanosheets supported on exfoliated graphene foil: an efficient 3D electrode for overall water splitting. *Energy Environ. Sci.* **9**, 478-483 (2016).
16. Luo, J. S. *et al.* Water photolysis at 12.3% efficiency via perovskite photovoltaics and Earth-abundant catalysts. *Science* **345**, 1593-1596 (2014).
17. Jia, Y. *et al.* A heterostructure coupling of exfoliated Ni-Fe hydroxide nanosheet and defective graphene as a bifunctional electrocatalyst for overall water splitting. *Adv. Mater.* **29**, 1700017 (2017).
18. Yu, L. *et al.* Cu nanowires shelled with NiFe layered double hydroxide nanosheets as bifunctional electrocatalysts for overall water splitting. *Energy Environ. Sci.* **10**, 1820-1827 (2017).



19. Wang, H. T. *et al.*, Bifunctional non-noble metal oxide nanoparticle electrocatalysts through lithium-induced conversion for overall water splitting. *Nat. Commun.* **6**, 7261 (2015).
20. Chen, G. F. *et al.* Efficient and stable bifunctional electrocatalysts Ni/Ni<sub>x</sub>M<sub>y</sub> (M = P, S) for overall water splitting. *Adv. Funct. Mater.* **26**, 3314-3323 (2016).
21. Zhang, R. *et al.* Ternary NiCo<sub>2</sub>P<sub>x</sub> Nanowires as pH-Universal Electrocatalysts for Highly Efficient Hydrogen Evolution Reaction. *Adv. Mater.* **29**, 1605502 (2017).
22. Liu, B. *et al.* Nickel-cobalt diselenide 3D mesoporous nanosheet networks supported on Ni foam: an all-pH highly efficient integrated electrocatalyst for hydrogen evolution. *Adv. Mater.* **29**, 1606521 (2017).
23. Tian, J. Q., Liu, Q., Asiri, A. M. & Sun, X. P. Self-supported nanoporous cobalt phosphide nanowire arrays: an efficient 3D hydrogen-evolving cathode over the wide range of pH 0-14. *J. Am. Chem. Soc.* **136**, 7587-7590 (2014).
24. Wang, H. *et al.* Nitrogen-doped nanoporous carbon membranes with Co/CoP Janus-type nanocrystals as hydrogen evolution electrode in both acidic and alkaline environments. *ACS Nano* **11**, 4358-4364 (2017).
25. Son, C. Y., Kwak, I. H., Lim, Y. R. & Park, J. FeP and FeP<sub>2</sub> nanowires for efficient electrocatalytic hydrogen evolution reaction. *Chem. Commun.* **52**, 2819-2822 (2016).
26. Zhang, J. *et al.* Efficient hydrogen production on MoNi<sub>4</sub> electrocatalysts with fast water dissociation kinetics. *Nat. Commun.* **8**, 15437 (2017).
27. Xiao, P. *et al.* Molybdenum phosphide as an efficient electrocatalyst for the hydrogen evolution reaction. *Energy Environ. Sci.* **7**, 2624-2629 (2014).
28. Laursen, A. B. *et al.* Nanocrystalline Ni<sub>5</sub>P<sub>4</sub>: a hydrogen evolution electrocatalyst of exceptional efficiency in both alkaline and acidic media. *Energy Environ. Sci.* **8**, 1027-1034

(2015).

29. Tan, Y. W. *et al.* 3D nanoporous metal phosphides toward high-efficiency electrochemical hydrogen production. *Adv. Mater.* **28**, 2951-2955 (2016).
30. Merki, D., Fierro, S., Vrabel, H. & Hu, X. L. Amorphous molybdenum sulfide films as catalysts for electrochemical hydrogen production in water. *Chem. Sci.* **2**, 1262-1267 (2011).
31. Chen, Y. Y. *et al.* Self-templated fabrication of MoNi<sub>4</sub>/MoO<sub>3-x</sub> nanorod arrays with dual active components for highly efficient hydrogen evolution. *Adv. Mater.* **29**, 1703311 (2017).
